# Supplementary material for: TENET 2.0: Identification of key transcriptional regulators and enhancers in lung adenocarcinoma
Source: PLoS Genet. 2020 Sep 14;16(9):e1009023. doi: 10.1371/journal.pgen.1009023 (PMC7515200; doi:10.1371/journal.pgen.1009023)
Supplement: S1 Table — (XLSX) [file pgen.1009023.s011.xlsx]

## Sheet: S1 Table
S1 Table. Datasets used in this study
Sample	Tissue type	Data type	GEO Study ID/	Generated in this study
			Study PMID/
			DRA Accession ID
Purified AT2-type cells (D0) (individual 1)	Alveolar epithelial cells	H3k27ac ChIP-seq
			GSM2230654
Transitional AT2 -> AT1 cells (D4) (individual 1)	Alveolar epithelial cells	H3k27ac ChIP-seq
			GSM2230655
Differentiated AT1-like cells (D6) (individual 1)	Alveolar epithelial cells	H3k27ac ChIP-seq
			GSM2230656
Purified AT2-type cells (D0) (individual 2)	Alveolar epithelial cells	H3k27ac ChIP-seq
			GSM4250941	Yes
Transitional AT2 -> AT1 cells (D4) (individual 2)	Alveolar epithelial cells	H3k27ac ChIP-seq
			GSM4250942	Yes
Differentiated AT1-like cells (D6) (individual 2)	Alveolar epithelial cells	H3k27ac ChIP-seq
			GSM4250943	Yes
Lung tissue	Lung tissue sample	H3k27ac ChIP-seq
			GSM2700592
Lung tissue	Lung tissue sample	H3k27ac ChIP-seq
			GSM1013123
Lung tissue	Lung tissue sample	H3k27ac ChIP-seq
			GSM906395
A549 cells	LUAD cell line	H3k27ac ChIP-seq
			GSM1003578
A427 cells (DBTSS)	LUAD cell line	H3k27ac ChIP-seq
			DRX015223
A549 cells (DBTSS)	LUAD cell line	H3k27ac ChIP-seq
			DRX015232
H322 cells (DBTSS)	LUAD cell line	H3k27ac ChIP-seq
			DRX015340
H1437 cells (DBTSS)	LUAD cell line	H3k27ac ChIP-seq
			DRX015259
H1648 cells (DBTSS)	LUAD cell line	H3k27ac ChIP-seq
			DRX015268
H1650 cells (DBTSS)	LUAD cell line	H3k27ac ChIP-seq
			DRX015277
H1703 cells (DBTSS)	LUAD cell line	H3k27ac ChIP-seq
			DRX015286
H1819 cells (DBTSS)	LUAD cell line	H3k27ac ChIP-seq
			DRX015295
H1975 cells (DBTSS)	LUAD cell line	H3k27ac ChIP-seq
			DRX015304
H2126 cells (DBTSS)	LUAD cell line	H3k27ac ChIP-seq
			DRX015313
H2347 cells (DBTSS)	LUAD cell line	H3k27ac ChIP-seq
			DRX015331
PC9 cells (DBTSS)	LUAD cell line	H3k27ac ChIP-seq
			DRX015394
Purified AT2-type cells (D0) (individual 3)	Alveolar epithelial cells	ATAC-seq
			GSM4250944	Yes
LUAD tissue	34 LUAD tissue samples	ATAC-seq
			PMID: 31209061
LUAD tissue	22 LUAD tissue samples	ATAC-seq
			PMID: 30361341
PC-9 cells	LUAD cell line	ATAC-seq
			GSM2692559
			GSM2692560
			GSM2692561
A549 cells	LUAD cell line	Dnase-seq
			GSM816665
PC-9 cells	LUAD cell line	DNase-seq
			GSM2400507
			GSM2400508
A549 cells	LUAD cell line	RNA-seq
			Control
			GSM4250945	Yes
			GSM4250946	Yes
			GSM4250947	Yes
			GSM4250948	Yes
			GSM4704964	Yes
			GSM4704965	Yes
			GSM4704966	Yes
			siMYBL2
			GSM4250949	Yes
			GSM4250950	Yes
			GSM4250951	Yes
			GSM4250952	Yes
			siFOXM1
			GSM4250953	Yes
			GSM4250954	Yes
			GSM4250955	Yes
			GSM4250956	Yes
			siMYBL2 + siFOXM1
			GSM4704967	Yes
			GSM4704968	Yes
			GSM4704969	Yes
A549 cells	LUAD cell line	Topologically associated domains
			ENCFF881QQG
GM12878 cells	B-Lymphocyte cell line	Topologically associated domains
			PMID: 25497547
